# Supplementary material
Source: publisher figshare collection journal article supplement (https://acs.figshare.com/ndownloader/files/4675783)
Supplement: Supplementary file 1 [file 4675783]

## Supplementary Material

### Thermal and Pressure Induced Cooperative Spin Transition in the 2D and 3D Coordination Polymers $\{\text{Fe}(\text{5-Br-pmd})[\text{M}(\text{CN})_x]_y\}$ ( $\text{M} = \text{Ag}(\text{I}), \text{Au}(\text{I}), \text{Ni}(\text{II}), \text{Pd}(\text{II}), \text{Pt}(\text{II})$ )

Gloria Agustí<sup>a</sup>, Ana Belén Gaspar<sup>a</sup>, M. Carmen Muñoz<sup>b</sup>, José Antonio Real<sup>a\*</sup>

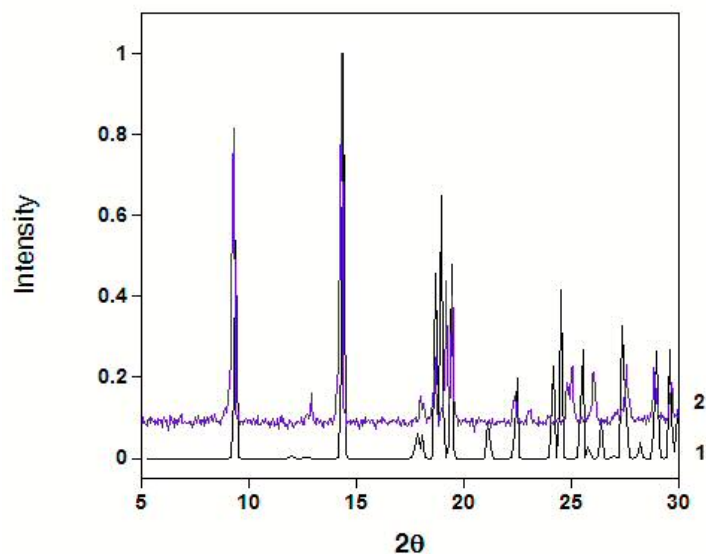

**FigureSM1.** XRD diffraction patterns of compounds **1** (calculated) and **2** (experimental) at 293 K. The representative peaks are as follow:  $2\theta$ : 9.30; 14.30; 18.70; 18.95; 19.44; 22.50.

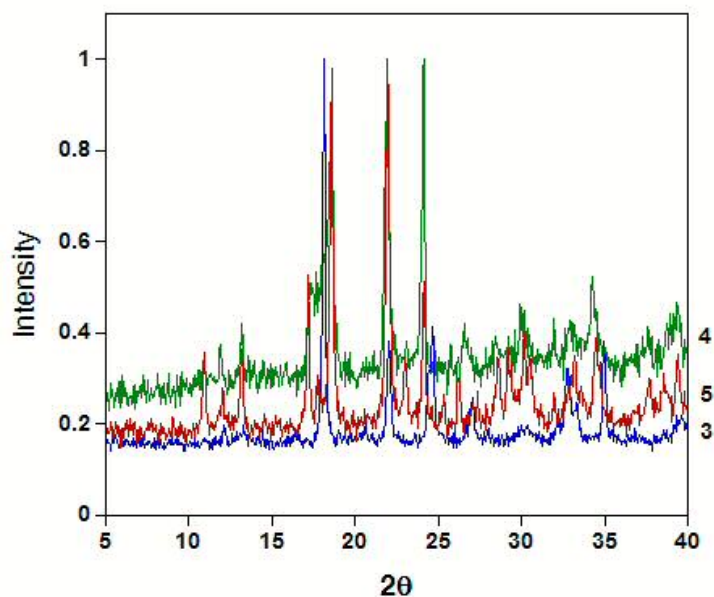

**FigureSM2.** XRD diffraction patterns of compounds **3-5** at 293 K. The representative peaks are as follow:  $2\theta$ : 11.80; 13.15; 18.50; 21.91; 24.15.

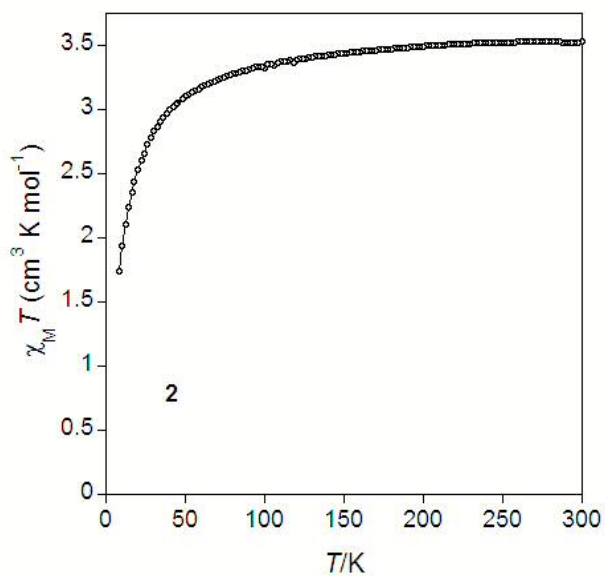

**FigureSM3.** Temperature dependent magnetic susceptibility measurement for **2** at atmospheric pressure (rate of measurements: 1 K/min).

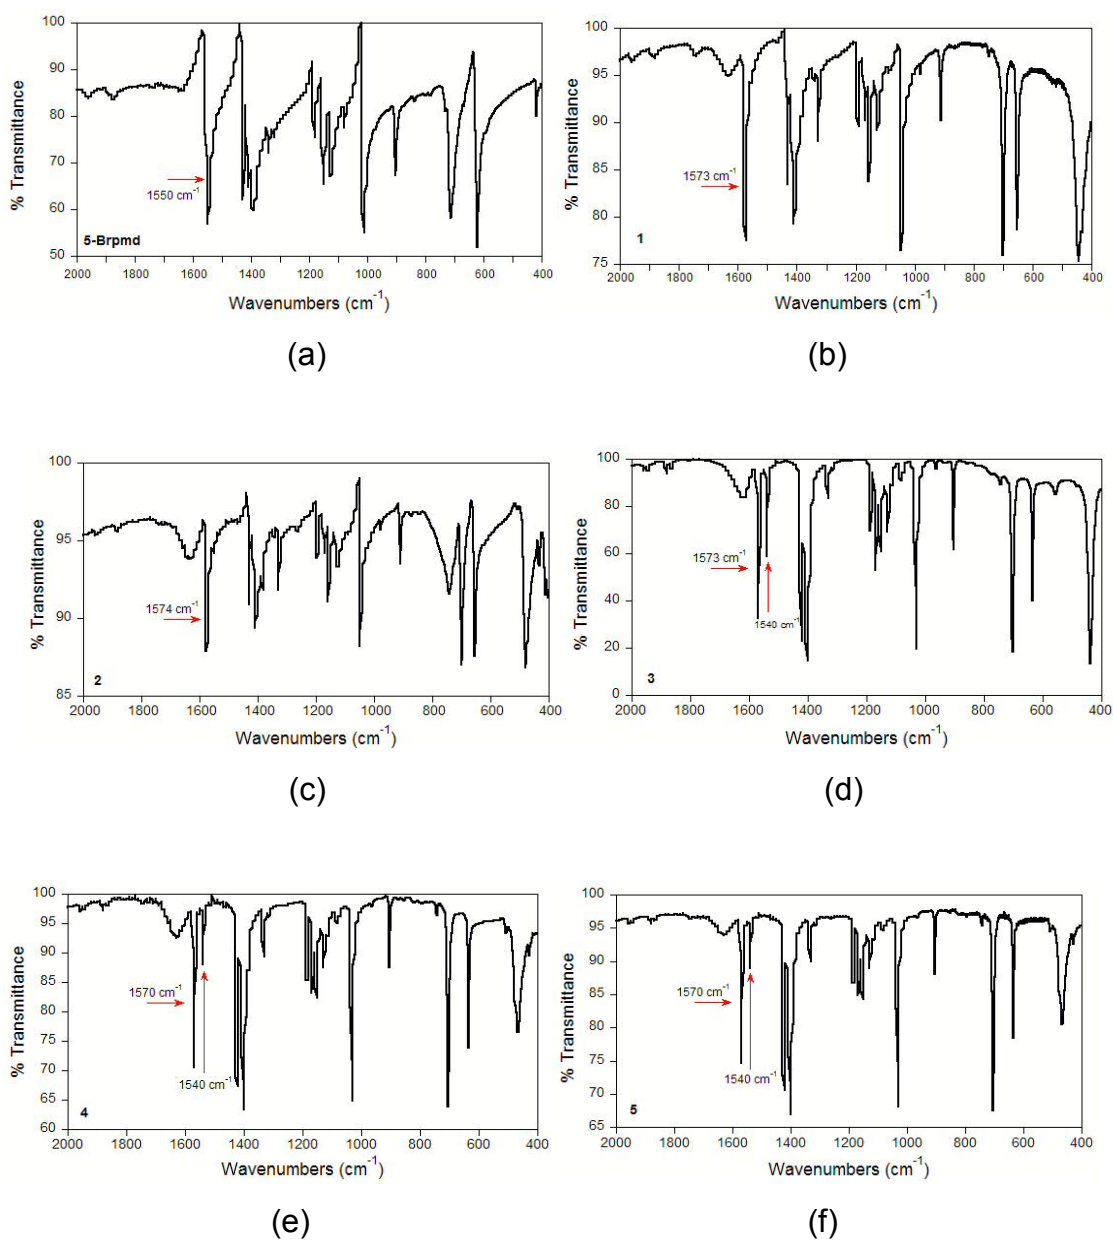

**FigureSM4.** IR spectra recorded at 293 K: a) ligand 5-Br-pmd and b)-f) the compounds **1-5**.
